# Supplementary material for: Phylogenomic and Comparative Analyses of Complete Plastomes of Croomia and Stemona (Stemonaceae)
Source: PubMed Central journal article supplement (PMC6122011; doi:10.3390/ijms19082383), 2018-08-13
Supplement: ijms-19-02383-s001.pdf [file ijms-19-02383-s001.pdf]

**Table S1.** The basic characteristics of five Stemonaceae chloroplast genomes.

| <b>Characteristics</b>    | <i>C. japonica</i> | <i>C. heterosepala</i> | <i>C. pauciflora</i> | <i>S. japonica</i> | <i>S. mairei</i> |
|---------------------------|--------------------|------------------------|----------------------|--------------------|------------------|
| Clean reads               | 29,120,480         | 14,478,324             | 31,094,272           | 17,784,508         | 14,163,520       |
| Average reads length (bp) | 125                | 150                    | 125                  | 150                | 150              |
| Number of contigs         | 83,092             | 50,369                 | 111,071              | 105,805            | 123,479          |
| Total length of contigs   | 29,978,872         | 19,017,346             | 47,503,502           | 41,588,737         | 45,904,433       |
| Total cpDNA size (bp)     | 154,672            | 154,407                | 155,261              | 154,224            | 154,307          |
| LSC length (bp)           | 81,981             | 81,844                 | 82,429               | 82,117             | 82,254           |
| SSC length (bp)           | 18,271             | 18,145                 | 18,346               | 17,943             | 17,889           |
| IR length (bp)            | 27,210             | 27,210                 | 27,243               | 27,082             | 27,082           |
| Total CDS length (bp)     | 79,452             | 79,488                 | 79,611               | 79,398             | 79,239           |
| Total tRNA length (bp)    | 2877               | 2877                   | 2877                 | 2877               | 2901             |
| Total rRNA length (bp)    | 9052               | 9052                   | 9052                 | 9060               | 9060             |
| Total GC content (%)      | 38.3               | 38.3                   | 38.3                 | 38.0               | 38.0             |
| LSC                       | 36.6               | 36.6                   | 36.6                 | 36.2               | 36.2             |
| SSC                       | 32.3               | 32.3                   | 32.5                 | 32.1               | 32.1             |
| IR                        | 42.8               | 42.8                   | 42.9                 | 42.7               | 42.7             |
| Total number of genes     | 134                | 134                    | 134                  | 134                | 134              |
| Protein-coding genes      | 80                 | 80                     | 80                   | 80                 | 80               |
| tRNA genes                | 30                 | 30                     | 30                   | 30                 | 30               |
| rRNA genes                | 4                  | 4                      | 4                    | 4                  | 4                |
| Duplicated genes          | 20                 | 20                     | 20                   | 20                 | 20               |

**Table S2.** The location information of the five Stemonaceae species.

| <b>Species</b>              | <b>Location</b>  | <b>Latitude</b> | <b>Longitude</b> |
|-----------------------------|------------------|-----------------|------------------|
| <i>Croomia japonica</i>     | Hangzhou, China  | 30.3303         | 119.4377         |
| <i>Croomia heterosepala</i> | Nara, Japan      | 34.5166         | 135.6833         |
| <i>Croomia pauciflora</i>   | Alabama, USA     | 32.8605         | -85.7975         |
| <i>Stemona japonica</i>     | Hangzhou, China  | 30.2283         | 119.1544         |
| <i>Stemona mairei</i>       | Zhongdian, China | 27.8231         | 99.7060          |
